# Supplementary material for: Religious Coping and Quality of Life Among Individuals Living With Schizophrenia
Source: Atypon-hosted journal article supplement (doi:10.1176/appi.ps.201000208), 2012-10-01
Supplement: 1051_ds001.pdf [file 1051_ds001.pdf]

**Table. Descriptive Statistics of Variables in the Models (N=63)**

| Variable                                                                                                                                                                                            | Variable subcategory                                          |                                                 |
|-----------------------------------------------------------------------------------------------------------------------------------------------------------------------------------------------------|---------------------------------------------------------------|-------------------------------------------------|
| <b>Independent Variables:</b>                                                                                                                                                                       |                                                               |                                                 |
| <b>Sociodemographic</b>                                                                                                                                                                             |                                                               | <b>N (%) or mean <math>\pm</math>SD (range)</b> |
| Age (mean $\pm$ SD)                                                                                                                                                                                 |                                                               | 42.19 $\pm$ 11.58 ( 20 to 63)                   |
| Gender                                                                                                                                                                                              | Female                                                        | 30 (48%)                                        |
| Race*                                                                                                                                                                                               | African-American                                              | 46 (73%)                                        |
| Education                                                                                                                                                                                           | HS Grad/GED or less                                           | 31 (49%)                                        |
| Marital Status                                                                                                                                                                                      | Married (currently)                                           | 6 (10%)                                         |
| Employ Type                                                                                                                                                                                         | Work (Paid/Vol./Rehab)                                        | 27 (43%)                                        |
| Living Arrangement                                                                                                                                                                                  | Independent                                                   | 17 (27%)                                        |
| <b>Health and Clinical:</b>                                                                                                                                                                         |                                                               | <b>Mean<math>\pm</math>SD</b>                   |
| Health                                                                                                                                                                                              | Self-Reported General Overall Health (one item from SF-12)    | 2.97 $\pm$ 1.02 (1 to 5)                        |
|                                                                                                                                                                                                     | Self-Esteem Index (ISE)                                       | 38.40 $\pm$ 14.93 ( 2.67 to 67.33)              |
|                                                                                                                                                                                                     | Happiness rating (happy) (1 not happy -10 most happy)         | 6.68 $\pm$ 2.14 (1 to 10)                       |
| Symptom Severity                                                                                                                                                                                    | PANSS Positive Symptoms                                       | 18.94 $\pm$ 4.60 (9 to 30)                      |
|                                                                                                                                                                                                     | PANSS Negative Symptoms                                       | 18.75 $\pm$ 5.63 (8 to 33)                      |
|                                                                                                                                                                                                     | PANSS General Psychopathology Symptoms                        | 42.06 $\pm$ 8.32 (25 to 61)                     |
| Depression                                                                                                                                                                                          | Clinical Global Impression (CGI)-Depressive Subscale          | 3.89 $\pm$ 1.36 (1 to 6)                        |
| Functioning                                                                                                                                                                                         | Global Assessment of Functioning Score (GAF) Score            | 52.89 $\pm$ 12.32 (27 to 90)                    |
|                                                                                                                                                                                                     | Social Functioning Questionnaire (SFQ) Activity Frequency     | 28.02 $\pm$ 4.89 (15 to 40)                     |
|                                                                                                                                                                                                     | Social Functioning Questionnaire (SFQ) Satisfaction           | 30.08 $\pm$ 6.36 (16 to 40)                     |
| Mental Illness History                                                                                                                                                                              | Number of Years Mentally Ill                                  | 17.84 $\pm$ 12.32 (1 to 57)                     |
|                                                                                                                                                                                                     | Number of Hospitalizations related to Mental illness          | 7.98 $\pm$ 11.45 (0 to 50)                      |
| Clinical                                                                                                                                                                                            | Medication Adherence Rating Score (MARS) Total                | 7.60 $\pm$ 2.15 (1 to 10)                       |
|                                                                                                                                                                                                     | Screen Positive for Substance Abuse                           | 24 (38%)                                        |
| <b>Religious Coping</b>                                                                                                                                                                             |                                                               |                                                 |
| RCOPE-BREF                                                                                                                                                                                          | RCOPE Positive                                                | 15.60 $\pm$ 4.18 (4 to 21)                      |
|                                                                                                                                                                                                     | RCOPE Negative                                                | 5.21 $\pm$ 3.76 (0 to 16)                       |
| <b>Main Dependent Variable</b>                                                                                                                                                                      |                                                               |                                                 |
| WHO Quality of Life Components                                                                                                                                                                      | Overall Quality of Life (item 1)                              | 63.89 $\pm$ 26.48 (0 to 100)                    |
|                                                                                                                                                                                                     | Health Satisfaction (item 2)                                  | 59.13 $\pm$ 30.22 (0 to 100)                    |
|                                                                                                                                                                                                     | Global Score on Overall Quality of Life & Health Satisfaction | 61.51 $\pm$ 22.60 (12.5 to 100)                 |
|                                                                                                                                                                                                     | Domain 1 Physical Health                                      | 53.80 $\pm$ 14.78 (14.29 to 85.71)              |
|                                                                                                                                                                                                     | Domain 2 Psychological Health                                 | 59.52 $\pm$ 14.46 (25 to 87.5)                  |
|                                                                                                                                                                                                     | Domain 3 Social Relationships                                 | 56.48 $\pm$ 21.45 (0 to 100)                    |
|                                                                                                                                                                                                     | Domain 4 Environment                                          | 56.80 $\pm$ 17.75 (15.63 to 100)**              |
| *Race has been dichotomized, multiracial has been dichotomized to first race mentioned by participant; one Native American was put in the African-American group.<br>** N=62 due to missing values. |                                                               |                                                 |

**Table. Positive and Negative Religious Coping Items Frequencies and Means (N=63)**

|                                                                                                                 | A Great Deal (3) | Quite A Bit (2) | Somewhat (1) | Not at All (0) | Mean± SD    |
|-----------------------------------------------------------------------------------------------------------------|------------------|-----------------|--------------|----------------|-------------|
| <b>Positive Religious Coping Questions</b>                                                                      |                  |                 |              |                |             |
| 1. I looked for a stronger connection with God. (spiritual connection)                                          | 37 (58.7%)       | 18 (28.6%)      | 7 (11.1%)    | 1 (1.6%)       | 2.44± 0.76  |
| 2. I sought God's love and care. (seeking spiritual support)                                                    | 38 (60.3%)       | 15 (23.8%)      | 9(14.3%)     | 1(1.6%)        | 2.43± 0.80  |
| 3. I sought help from God in letting go of my anger. (religious forgiveness)                                    | 26 (41.3%)       | 16 (25.4%)      | 16(25.4%)    | 5(7.9%)        | 2.00± 1.00  |
| 4. I tried to put my plans into action together with God. (collaborative religious coping)                      | 31 (49.2%)       | 17 (27.0%)      | 14 (22.2%)   | 1(1.6%)        | 2.24 ± 0.86 |
| 5. I tried to see how God might be trying to strengthen me in the situation. (benevolent religious reappraisal) | 33(52.4%)        | 19(30.2%)       | 11(17.5%)    | 0              | 2.35 ±0.77  |
| 6. I asked forgiveness for my sins. (religious purification)                                                    | 44 (69.8%)       | 11(17.5%)       | 6 (9.5%)     | 2(3.2%)        | 2.54 ±0.80  |
| 7. I focused on religion to stop worrying about my problems. (religious focus)                                  | 16(25.4%)        | 16(25.4%)       | 21(33.3%)    | 10(15.9%)      | 1.60 ±1.04  |
| <b>Negative Religious Coping Questions</b>                                                                      |                  |                 |              |                |             |
| 8. I wonder whether God had abandoned me. (spiritual discontent)                                                | 5 (7.9%)         | 10 (15.9%)      | 25(39.7%)    | 23 (36.5%)     | 0.95± 0.92  |
| 9. I felt punished by God for my lack of devotion. (punishing God reappraisal)                                  | 4(6.3%)          | 12(19.0%)       | 21(33.3%)    | 26(41.3%)      | 0.90±0.93   |
| 10. I wondered what I did for God to punish me. (punishing God reappraisal)                                     | 4(6.3%)          | 11(17.5%)       | 19(30.2%)    | 29(46.0%)      | 0.84±0.94   |
| 11. I questioned God's love for me. (spiritual discontent)                                                      | 8(12.7%)         | 6(9.5%)         | 18(28.6%)    | 31(49.2%)      | 0.86±1.05   |
| 12. I wondered whether my church had abandoned me. (interpersonal religious discontent)                         | 2(3.2%)          | 4(6.3%)         | 14(22.2%)    | 43(68.3%)      | 0.44±0.76   |
| 13. I decided the Devil made this happen. (demonic reappraisal)                                                 | 9(14.3%)         | 4(6.3%)         | 19(30.2%)    | 31(49.2%)      | 0.86±1.06   |
| 14. I questioned the power of God. (reappraisal of God's power)                                                 | 1(1.6%)          | 3(4.8%)         | 13(20.6%)    | 46(73.0%)      | 0.35±0.65   |

**Table. World Health Organization Quality of Life (WHOQOL)-BREF Items Frequencies and Means (N=63)\***

| The following questions ask how you feel about your quality of life, health, or other areas of your life.                               |                       |                  |                                        |               |                                 |             |
|-----------------------------------------------------------------------------------------------------------------------------------------|-----------------------|------------------|----------------------------------------|---------------|---------------------------------|-------------|
| Please keep in mind your standards, hopes, pleasures and concerns. We ask that you think about your life <b>in the last four weeks.</b> |                       |                  |                                        |               |                                 |             |
|                                                                                                                                         | Very poor (1)         | Poor (2)         | Neither poor nor good (3)              | Good (4)      | Very good (5)                   | Mean SD     |
| 1. How would you rate your quality of life?                                                                                             | 3 (4.8%)              | 8 (12.7%)        | 13(20.6%)                              | 29 (46.0%)    | 10 (15.9%)                      | 3.56 ±1.06  |
|                                                                                                                                         | Very dissatisfied (1) | Dissatisfied (2) | Neither satisfied nor dissatisfied (3) | Satisfied (4) | Very satisfied (5)              |             |
| 2. How satisfied are you with your health?                                                                                              | 3(4.8%)               | 17 (27.0%)       | 9 (14.3%)                              | 22(34.9%)     | 12 (19.0%)                      | 3.37± 1.21  |
| The following questions ask about <b>how much</b> you have experienced certain things in the last four weeks.                           |                       |                  |                                        |               |                                 |             |
|                                                                                                                                         | Not at all (1)        | A little (2)     | A moderate amount (3)                  | Very much (4) | An extreme amount/extremely (5) |             |
| 3. To what extent do you feel that physical pain prevents you from doing what you need to do?                                           | 20 (31.7%)            | 12 (19.0%)       | 14 (22.2%)                             | 15(23.8%)     | 2(3.2%)                         | 3.52 ±1.26  |
| 4. How much do you need any medical treatment to function in your daily life?                                                           | 3 (4.8%)              | 19 (30.2 %)      | 21 (33.3%)                             | 8 (12.7%)     | 12 (19.0%)                      | 2.89± 1.19* |
| 5. How much do you enjoy life?                                                                                                          | 0                     | 7 (11.1%)        | 15 (23.8%)                             | 23 (36.5%)    | 18 (28.6%)                      | 3.83± 0.98  |
| 6. To what extent do you feel your life to be meaningful?                                                                               | 3 (4.8%)              | 7 (11.1%)        | 13 (20.6%)                             | 25 (39.7%)    | 15 (23.8%)                      | 3.67± 1.11  |
| 7. How well are you able to concentrate?                                                                                                | 1 (1.6%)              | 16 (25.4%)       | 28 (44.4%)                             | 14 (22.2%)    | 4 (6.3%)                        | 3.06± 0.90  |
| 8. How safe do you feel in your daily life?                                                                                             | 5 (7.9%)              | 15 (23.8%)       | 19 (30.2%)                             | 18 (28.6%)    | 6 (9.5%)                        | 3.08± 1.11  |
| 9. How healthy is your physical environment?                                                                                            | 2 (3.2%)              | 11 (17.7%)       | 17 (27.4%)                             | 26 (41.9%)    | 6 (9.7%)                        | 3.37± 1.00* |
|                                                                                                                                         | Not at all (1)        | A little (2)     | Moderately (3)                         | Mostly (4)    | Completely (5)                  |             |
| 10. Do you have enough energy for everyday life?                                                                                        | 6 (9.5%)              | 7 (11.1%)        | 21 (33.3%)                             | 19 (30.2%)    | 10 (15.9%)                      | 3.32± 1.16  |
| 11. Are you able to                                                                                                                     | 7 (11.1%)             | 6 (9.5%)         | 14 (22.2%)                             | 25 (39.7%)    | 11 (17.5%)                      | 3.43±       |

|                                                                                      |                       |                  |                                        |               |                    |                |
|--------------------------------------------------------------------------------------|-----------------------|------------------|----------------------------------------|---------------|--------------------|----------------|
| accept your bodily appearance?                                                       |                       |                  |                                        |               |                    | 1.21           |
| 12. Have you enough money to meet your needs?                                        | 24(38.1%)             | 11(17.5%)        | 12(19.0%)                              | 11(17.5%)     | 5(7.9%)            | 2.40±<br>1.36  |
| 13. How available to you is the information that you need in your day-to-day life?   | 1(1.6%)               | 9(14.5%)         | 20(32.3%)                              | 14(22.6%)     | 18(29.0%)          | 3.63±<br>1.11* |
| 14. To what extent do you have the opportunity for leisure activities?               | 4(6.3%)               | 18(28.6%)        | 19(30.2%)                              | 13(20.6%)     | 9(14.3%)           | 3.08±<br>1.15  |
|                                                                                      | Very poor (1)         | Poor (2)         | Neither poor nor good (3)              | Good (4)      | Very good (5)      |                |
| 15. How well are you able to get around?                                             | 4(6.3%)               | 8(12.7%)         | 10(15.9%)                              | 28(44.4%)     | 13(20.6%)          | 3.60<br>±1.14  |
|                                                                                      | Very dissatisfied (1) | Dissatisfied (2) | Neither satisfied nor dissatisfied (3) | Satisfied (4) | Very satisfied (5) |                |
| 16. How satisfied are you with your sleep?                                           | 6(9.5%)               | 20(31.7%)        | 5(7.9%)                                | 26(41.3%)     | 6(9.5%)            | 3.10±<br>1.23  |
| 17. How satisfied are you with your ability to perform your daily living activities? | 7(11.3%)              | 9(14.5%)         | 11(17.7%)                              | 22(35.5%)     | 13(21.0%)          | 3.40±<br>1.29* |
| 18. How satisfied are you with your capacity for work?                               | 10(16.1%)             | 15(24.2%)        | 9(14.5%)                               | 18(29.0%)     | 10(16.1%)          | 3.05±<br>1.36* |
| 19. How satisfied are you with yourself?                                             | 3(4.8%)               | 16(25.4%)        | 10(15.9%)                              | 16(25.4%)     | 18(28.6%)          | 3.48±<br>1.28  |
| 20. How satisfied are you with your personal relationships?                          | 4(6.3%)               | 15(23.8%)        | 12(19.0%)                              | 21(33.3%)     | 11(17.5%)          | 3.32±<br>1.20  |
| 21. How satisfied are you with your sex life?                                        | 11(17.5%)             | 10(15.9%)        | 18(28.6%)                              | 17(27.0%)     | 7(11.1%)           | 2.98±<br>1.26  |
| 22. How satisfied are you with the support you get from your friends?                | 5(7.9%)               | 6(9.5%)          | 18(28.6%)                              | 22(34.9%)     | 12(19.0%)          | 3.48±<br>1.5   |
| 23. How satisfied are you with the conditions of your living place?                  | 8(12.7%)              | 9(14.3%)         | 11(17.5%)                              | 24(38.1%)     | 11(17.5%)          | 3.33±<br>1.28  |
| 24. How satisfied are                                                                | 5(7.9%)               | 6(9.5%)          | 6(9.5%)                                | 28(44.4%)     | 18(28.6%)          | 3.76           |

|                                                                                                                |           |            |                 |                |            |               |
|----------------------------------------------------------------------------------------------------------------|-----------|------------|-----------------|----------------|------------|---------------|
| you with your access to health services?                                                                       |           |            |                 |                |            | ±1.20         |
| 25. How satisfied are you with your transport?                                                                 | 6(9.5%)   | 12(19.0%)  | 7(11.1%)        | 25(39.7%)      | 13(20.6%)  | 3.43<br>±1.28 |
| The following question refers to how often you have felt or experienced certain things in the last four weeks. |           |            |                 |                |            |               |
|                                                                                                                | Never (1) | Seldom (2) | Quite often (3) | Very often (4) | Always (5) |               |
| 26. How often do you have negative feelings such as blue mood, despair, anxiety, depression?                   | 6(9.5%)   | 19(30.2%)  | 21(33.3%)       | 14(22.2%)      | 3(4.8%)    | 3.17±<br>1.04 |
| * N=62 due to missing values.                                                                                  |           |            |                 |                |            |               |

**Table. Supplementary Religious/Spiritual Descriptives (N=63)**

|                                                                                                      |                                              |            |                      |                   |                                           |
|------------------------------------------------------------------------------------------------------|----------------------------------------------|------------|----------------------|-------------------|-------------------------------------------|
| Religious Affiliation                                                                                |                                              |            |                      |                   |                                           |
|                                                                                                      | Protestant (specific denomination mentioned) | 37 (58.7%) |                      |                   |                                           |
|                                                                                                      | Protestant (nondemoninational)               | 8 (12.7%)  |                      |                   |                                           |
|                                                                                                      | Catholic                                     | 2(3.2%)    |                      |                   |                                           |
|                                                                                                      | Christian (unaffiliated with a denomination) | 3(4.8%)    |                      |                   |                                           |
|                                                                                                      | Jewish                                       | 1(1.6%)    |                      |                   |                                           |
|                                                                                                      | Other Religious Tradition                    | 3(4.8%)    |                      |                   |                                           |
|                                                                                                      | Other Spiritual Practice                     | 2(3.2%)    |                      |                   |                                           |
|                                                                                                      | No Affiliation                               | 4(6.3%)    |                      |                   |                                           |
|                                                                                                      | Agnostic                                     | 2(3.2%)    |                      |                   |                                           |
|                                                                                                      | Atheist                                      | 1(1.6%)    |                      |                   |                                           |
| Mention religion/spirituality as coping strategy without prompting during the interview              | Yes = 26 (41.3%)                             |            |                      |                   |                                           |
| Participation in Religious Services or activities (prayer groups, meetings, services etc.)           | Yes = 43(68.3%)                              |            |                      |                   |                                           |
| Importance to take part in religious services                                                        | Very Much                                    | Much       | Fairly               | A Little          | Not at All                                |
|                                                                                                      | 24 (38.1%)                                   | 12 (19.0%) | 12 (19.0%)           | 5 (7.9%)          | 10 (15.9%)                                |
| Importance to be connected to religious community                                                    | Very Much                                    | Much       | Fairly               | A Little          | Not at All                                |
|                                                                                                      | 28 (44.4%)                                   | 12 (19.0%) | 11 (17.5%)           | 4 (6.3%)          | 8 (12.7%)                                 |
| Participation in Private religious or spiritual activities (such as prayer, meditation, sacred text) | Yes = 57 (90.5%)                             |            |                      |                   |                                           |
| How often do you pray                                                                                | Several Times a Day                          | Once a Day | Several Times a week | About once a week | About once a month to at most once a year |
|                                                                                                      | 31 (49.2%)                                   | 19 (30.2%) | 6 (9.5%)             | 1 (1.6%)          | 6 (9.6%)                                  |
| Does Your Life have Meaning                                                                          | Yes= 57 (90.5%)                              |            |                      |                   |                                           |
| Importance of you beliefs in your everyday life                                                      | 8.48 ±1.92                                   |            |                      |                   |                                           |
| Probable that higher power really exists                                                             | Very Much                                    | Much       | Fairly               | A little          |                                           |
|                                                                                                      | 50 (79.4%)                                   | 7 (11.1%)  | 4 (6.3%)             | 2 (3.2%)          |                                           |

**Table. Correlation of Religious Coping (RCOPE) with Quality of Life (WHO Quality of Life) (N=63)**

|                                  |                                 | WHO Quality of Life (Q1) Quality of Life | WHO Quality of Life (Q2) Health Satisfaction | WHO Quality of Life Overall Quality of Life (Q1) & Health Satisfaction (Q2) | WHO Quality of Life Domain 1 Physical Health | WHO Quality of Life Domain 2 Psychological | WHO Quality of Life Domain 3 Social Relationship | WHO Quality of Life Domain 4 Environment |
|----------------------------------|---------------------------------|------------------------------------------|----------------------------------------------|-----------------------------------------------------------------------------|----------------------------------------------|--------------------------------------------|--------------------------------------------------|------------------------------------------|
| <b>Positive Religious Coping</b> | Pearson Correlation r           | .13                                      | .10                                          | .14                                                                         | <b>.22</b>                                   | <b>.28*</b>                                | .16                                              | .02                                      |
|                                  | p-value significance (2-tailed) | .32                                      | .45                                          | .28                                                                         | <b>.08</b>                                   | <b>.03</b>                                 | .22                                              | .87                                      |
| <b>Negative Religious Coping</b> | Pearson Correlation r           | <b>-.30*</b>                             | .06                                          | -.14                                                                        | -.18                                         | -.19                                       | -.10                                             | -.15                                     |
|                                  | p-value significance (2-tailed) | <b>.02</b>                               | .63                                          | .28                                                                         | .17                                          | .13                                        | .44                                              | .25                                      |

\* p&lt;.05

**Table. Final multivariate regression model of associations of three covariates and Negative Religious Coping (RCOPE Negative) with five quality of life facets among 62 individuals with schizophrenia<sup>a</sup>**

| Parameter                    | Model 1. <sup>b</sup>                         |                            | Model 2. <sup>c</sup> |                          | Model 3. <sup>d</sup>  |                           | Model 4. <sup>e</sup>         |                            | Model 5. <sup>f</sup> |                           | Multivariate Test          |
|------------------------------|-----------------------------------------------|----------------------------|-----------------------|--------------------------|------------------------|---------------------------|-------------------------------|----------------------------|-----------------------|---------------------------|----------------------------|
|                              | Overall Quality of Life & Health Satisfaction |                            | Domain 1 Physical     |                          | Domain 2 Psychological |                           | Domain 3 Social Relationships |                            | Domain 4 Environment  |                           | Wilks' Lambda <sup>g</sup> |
|                              | B                                             | 95% CI                     | B                     | 95% CI                   | B                      | 95% CI                    | B                             | 95% CI                     | B                     | 95% CI                    |                            |
| Intercept                    | -5.45                                         | -32.99 to 22.10            | 16.95                 | -3.54 to 37.44           | 34.82**                | 14.46 to 55.18            | 42.62**                       | 11.10 to 74.14             | 16.07                 | -6.29 to 38.43            | .68**                      |
| Self-Reported Health         | 12.21***                                      | 7.89 to 16.54              | 5.75**                | 2.53 to 8.96             | .77                    | -2.43 to 3.96             | -1.89                         | -6.84 to 3.06              | 2.57                  | -.94 to 6.07              | .51***                     |
| Self-Esteem                  | -.14                                          | -.44 to .16                | -.14                  | -.36 to .09              | -.27*                  | -.49 to -.044             | -.48**                        | -.83 to -.13               | -.35**                | -.60 to -.11              | .75**                      |
| Social Function Satisfaction | 1.20**                                        | .48 to 1.91                | .84**                 | .31 to 1.38              | 1.11***                | .58 to 1.65               | 1.27**                        | .45 to 2.09                | 1.49***               | .91 to 2.08               | .55***                     |
| RCOPE Negative               | -.05                                          | -1.18 to 1.09 <sup>h</sup> | -.14                  | -.98 to .71 <sup>i</sup> | -.16                   | -1.00 to .67 <sup>j</sup> | .05                           | -1.25 to 1.34 <sup>k</sup> | .26                   | -.66 to 1.18 <sup>l</sup> | .99                        |

<sup>a</sup>This reduced model controlled for health covariates. Sample size is 62 due to missing values.

<sup>b</sup>Adjusted  $R^2 = .56$

<sup>c</sup>Adjusted  $R^2 = .43$

<sup>d</sup>Adjusted  $R^2 = .41$

<sup>e</sup>Adjusted  $R^2 = .28$

<sup>f</sup>Adjusted  $R^2 = .52$

<sup>g</sup>df=1 and 58

<sup>h</sup> $R^2 = .00$

<sup>i</sup> $R^2 = .00$

<sup>j</sup> $R^2 = .00$

<sup>k</sup> $R^2 = .00$



<sup>1</sup>R<sup>2</sup> = .01  
\*p<.05  
\*\*p<.01  
\*\*\*p<.001
